# Supplementary material for: Uncertainty-based competition between prefrontal and dorsolateral striatal systems for behavioral control
Source: Springer Nature journal article supplement (doi:10.1038/nn1560), 2005-11-06
Supplement: 41593_2005_BFnn1560_MOESM2_ESM.pdf [file 41593_2005_BFnn1560_MOESM2_ESM.pdf]

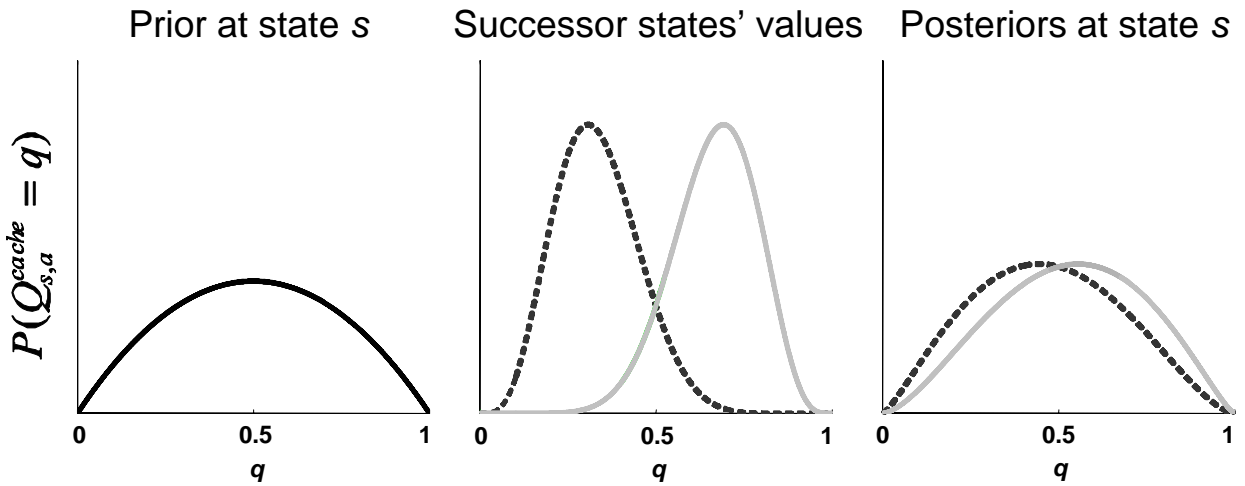

**Supplementary Figure 2**

Example of learning in the cache algorithm, following a single transition from state  $s$  to  $s'$  having taken action  $a$ . The leftmost panel shows the prior distribution  $Q_{s,a}^{cache}$ . The middle panel plots the distribution over the value of the successor state  $s'$  (specifically, the distribution  $Q_{s',a'}^{cache}$  for the best action  $a'$  in  $s'$ ). The curves illustrate two different successors, a more and less favorable state. For both of the successor states, the right panel plots the posterior distribution (whose moments are given by Equations 3 and 4 in **Supplementary Methods**) over the original state and action,  $Q_{s,a}^{cache}$ , as updated following the visit to  $s'$ . The effect of learning was to nudge the predecessor state's value distribution in the direction of the value of the successor state.
